# Supplementary material for: Impact of Structural Functionalization, Pore Size, and Presence of Extra-Framework Ions on the Capture of Gaseous I2 by MOF Materials
Source: MDPI journal article supplement (doi:10.3390/nano11092245), 2021-08-30
Supplement: s1 [file s1]

## **Supplementary Material**

### **Impact of Structural Functionalization, Pore Size, and Presence of Extra-Framework Ions on the Capture of Gaseous I<sub>2</sub> by MOF Materials**

**Fabrice Salles \* and Jerzy Zajac**

ICGM, Université Montpellier CNRS ENSCM, 34090 Montpellier, France; jerzy.zajac@umontpellier.fr

\* Correspondence: fabrice.salles@umontpellier.fr

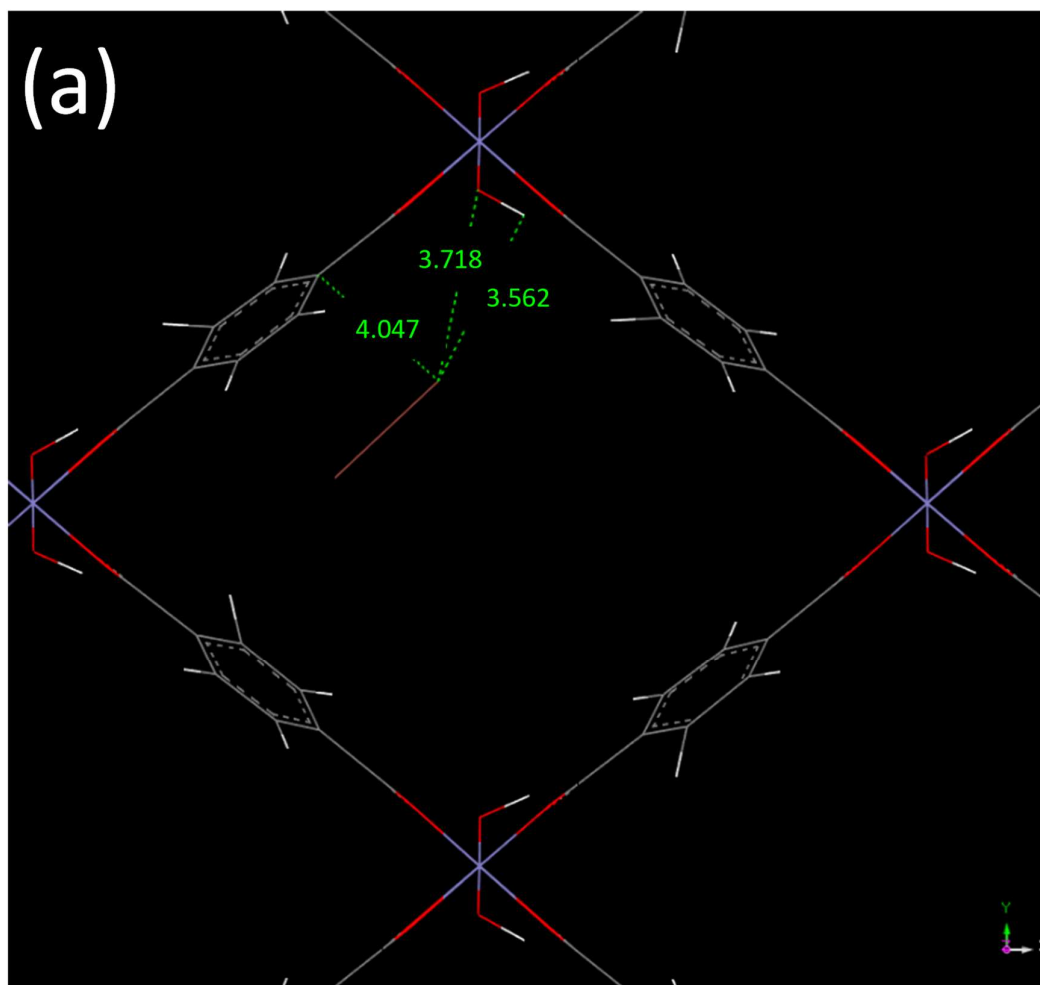

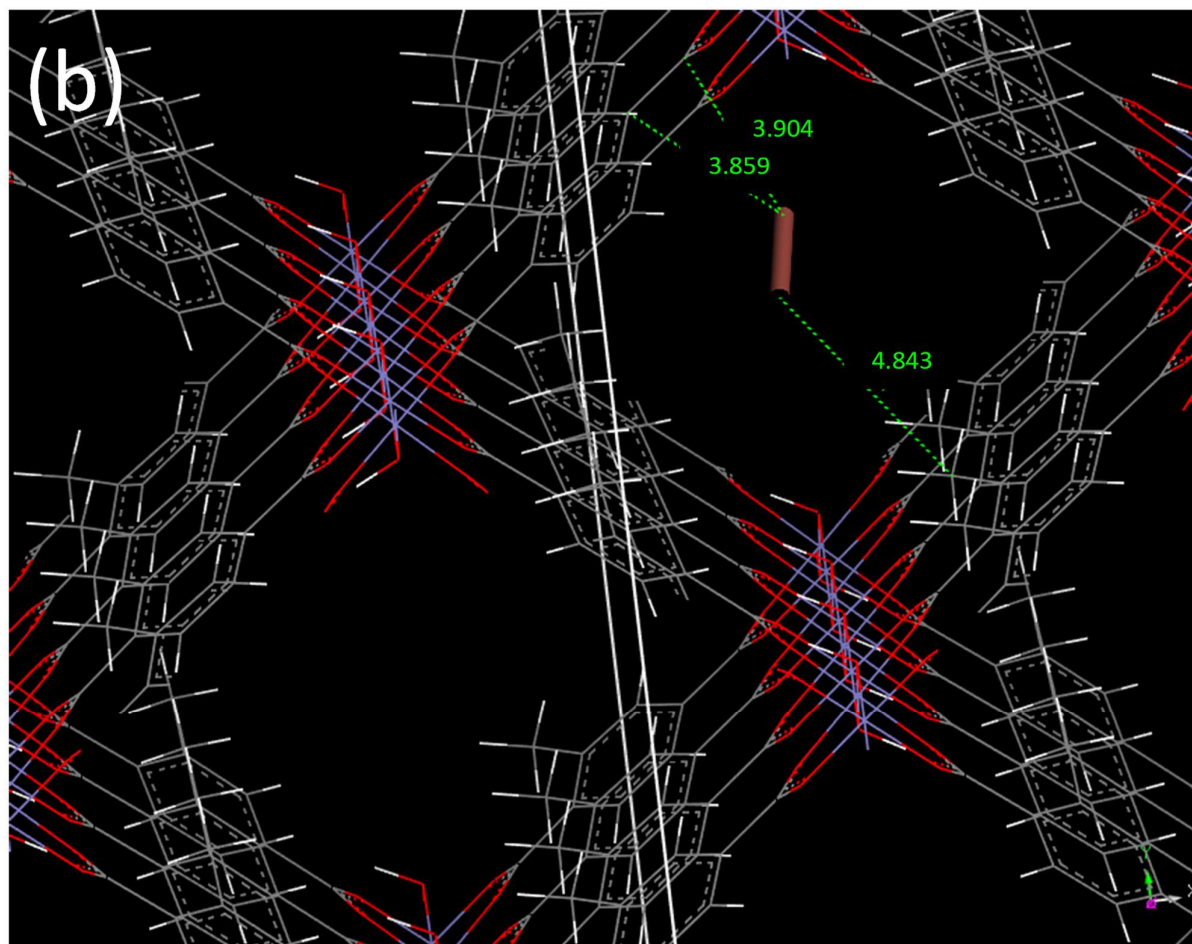

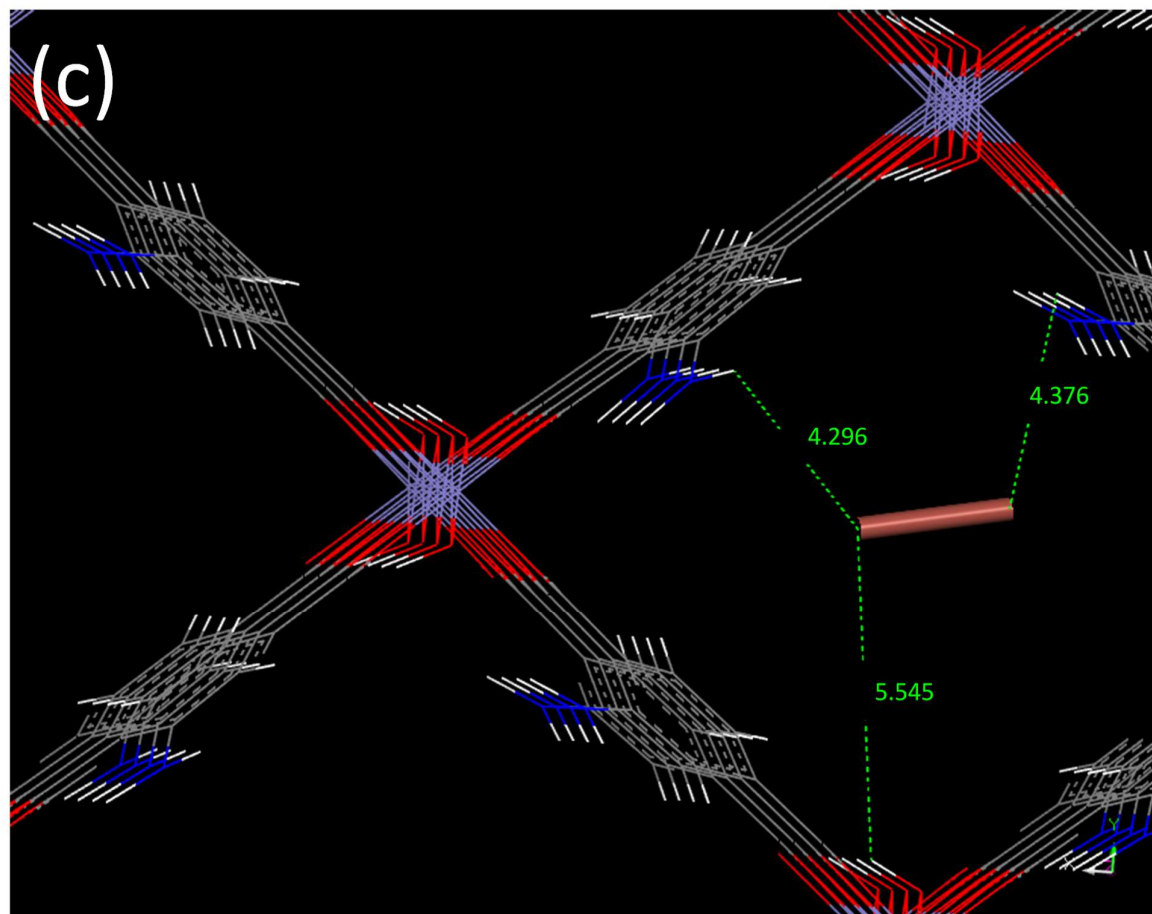

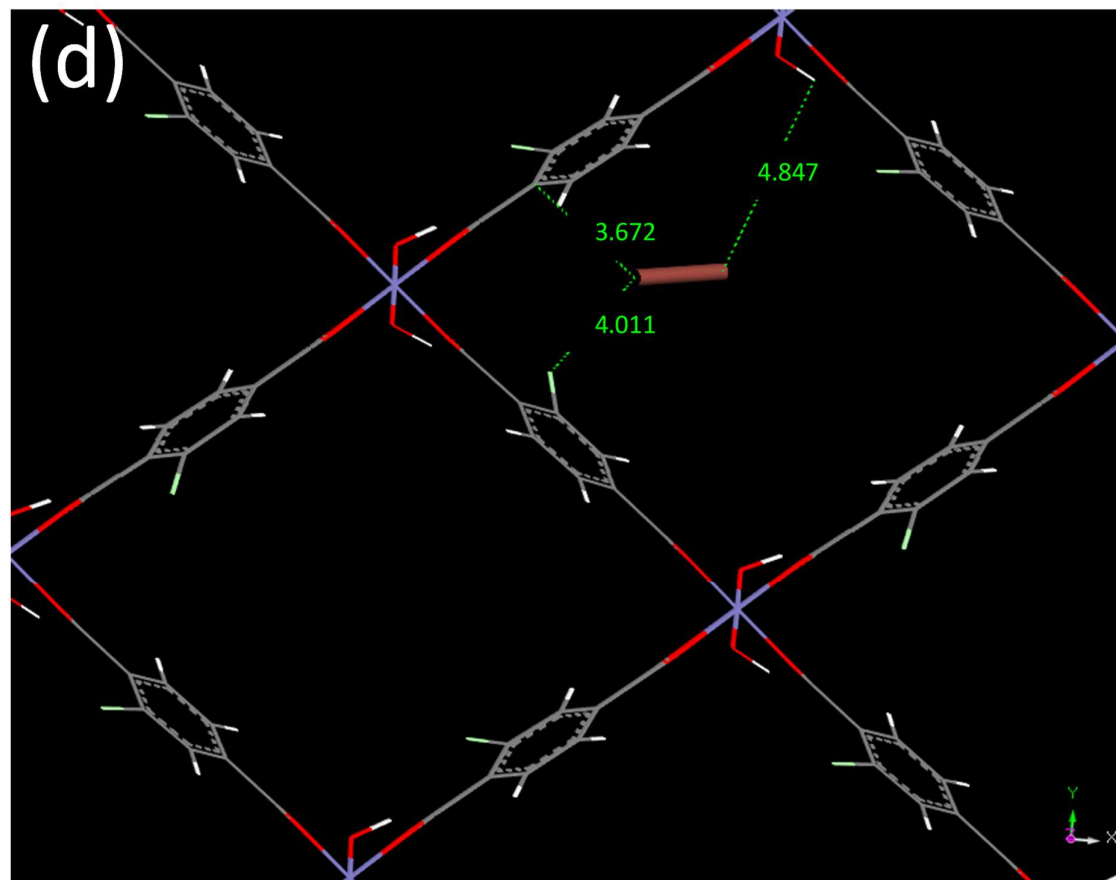

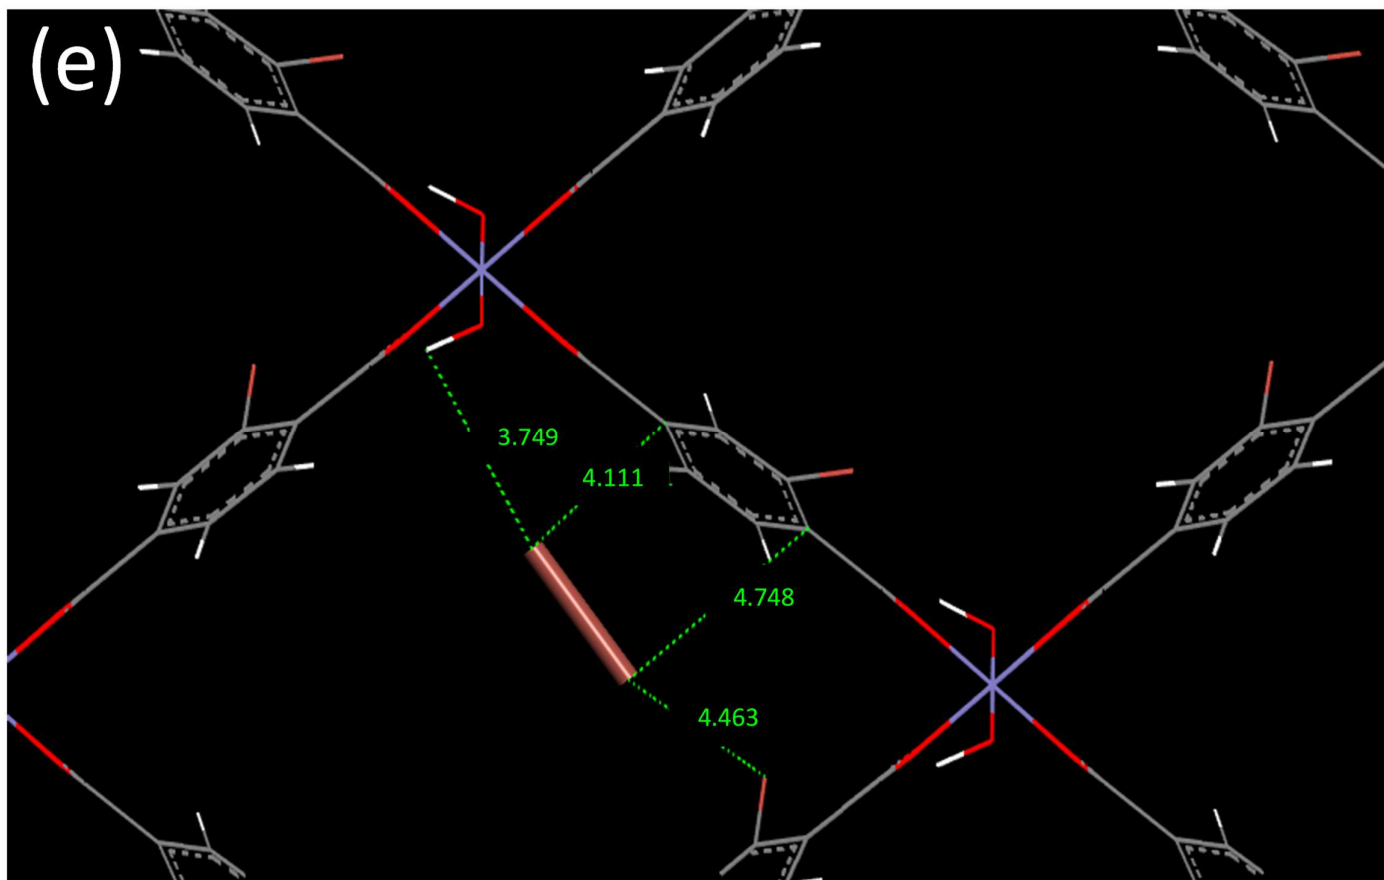

**Figure S1.** Molecular conformations of the first I<sub>2</sub> molecule adsorbed onto MOF structures belonging to the MIL-53 series functionalized by: (a) H, (b) CH<sub>3</sub>, (c) NH<sub>2</sub>, (d) Cl, (e) Br, as obtained based on the Monte Carlo simulations.

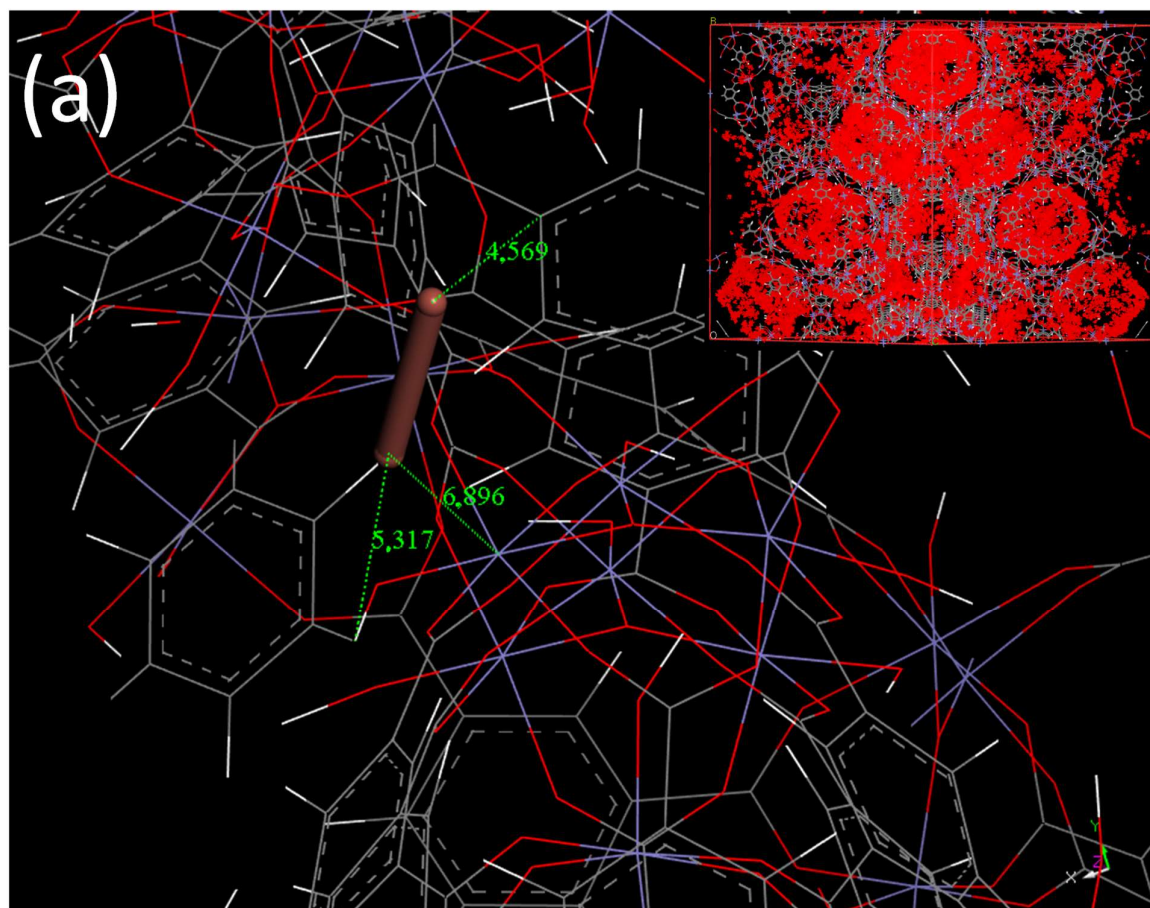

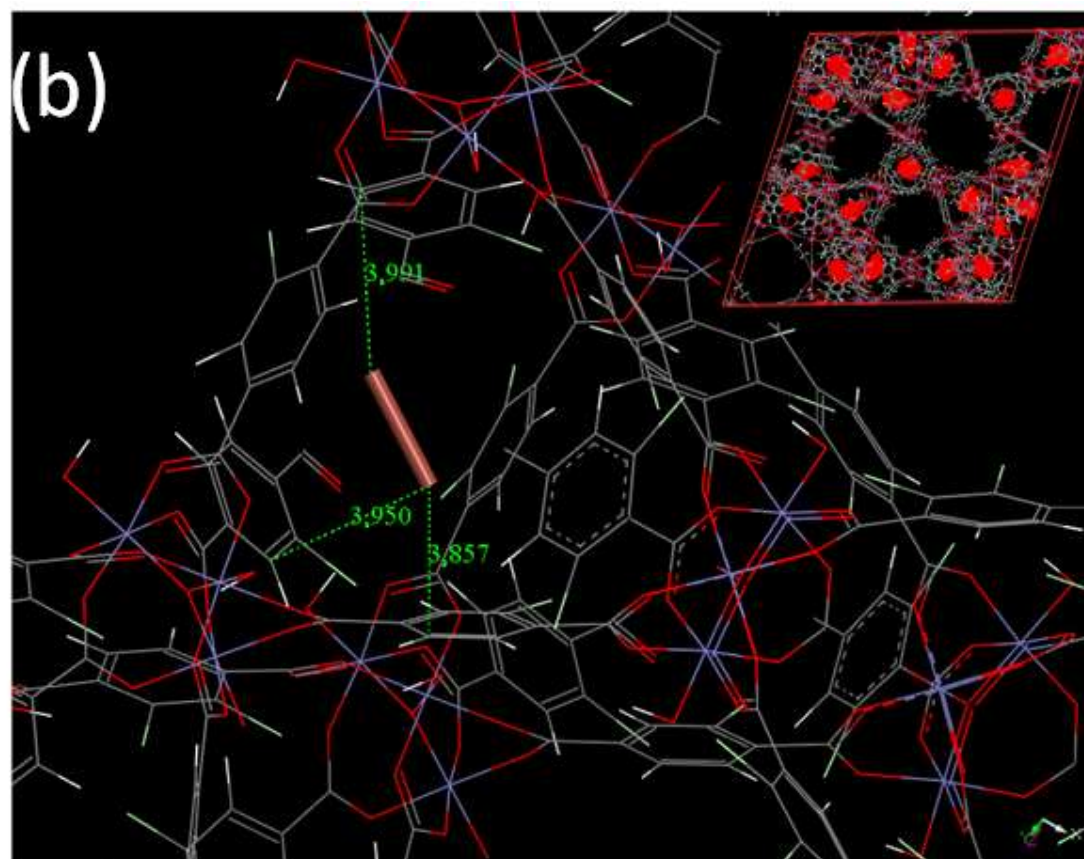



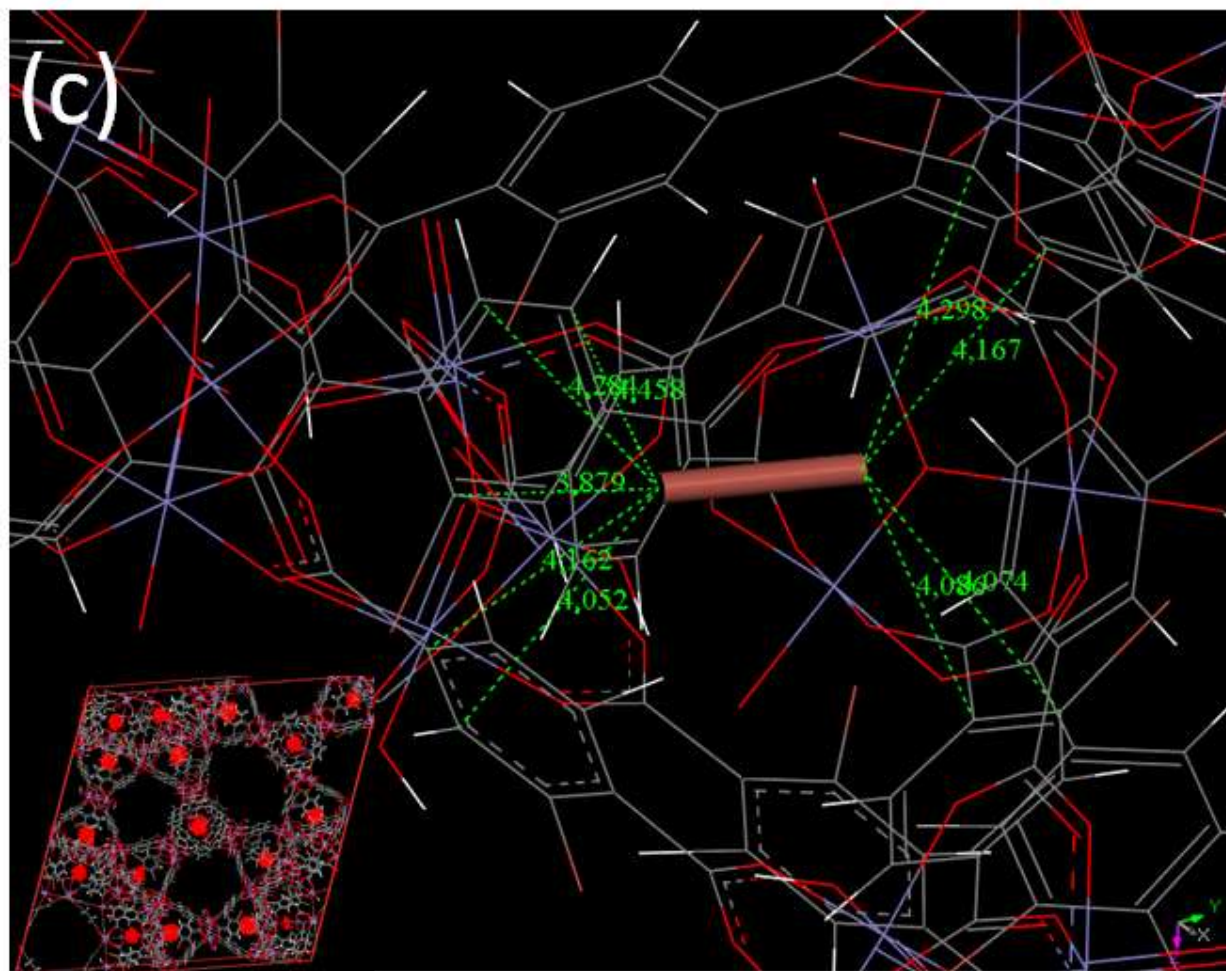

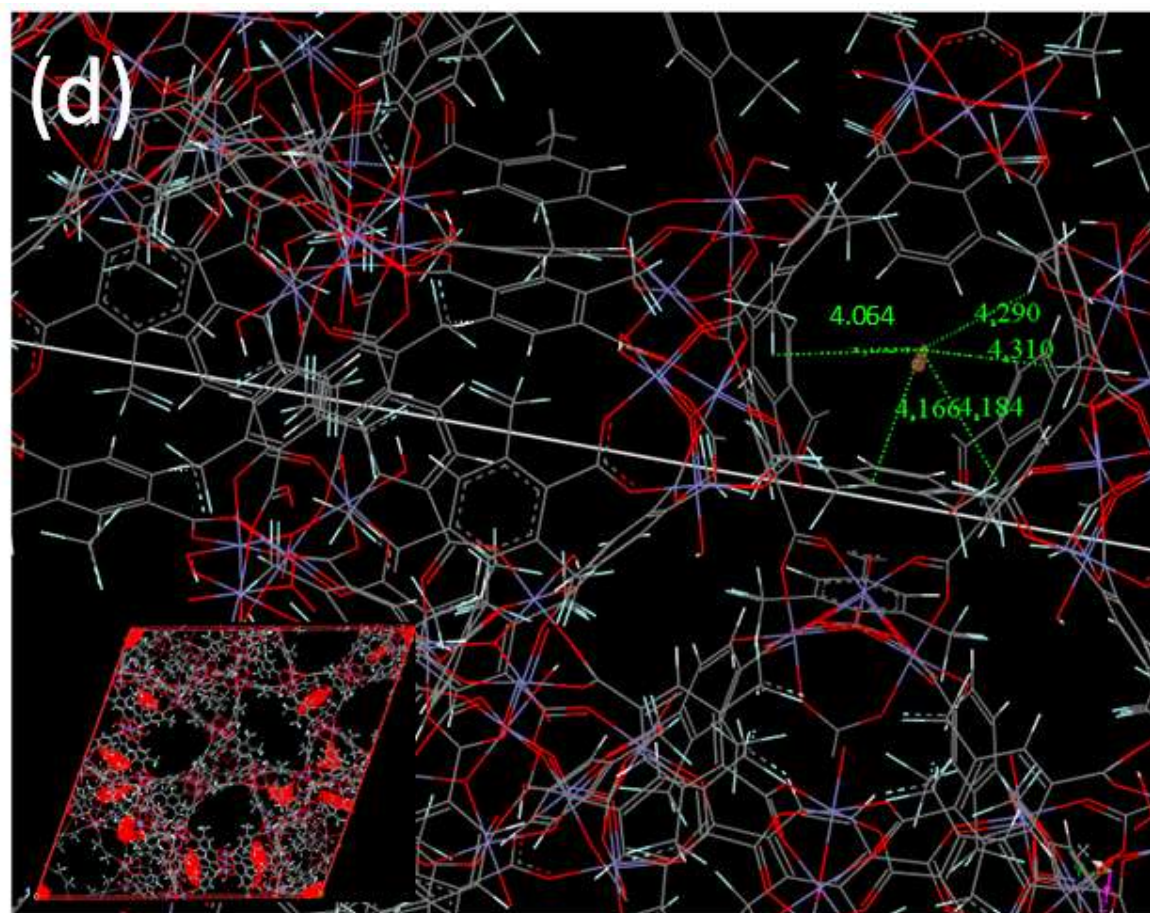

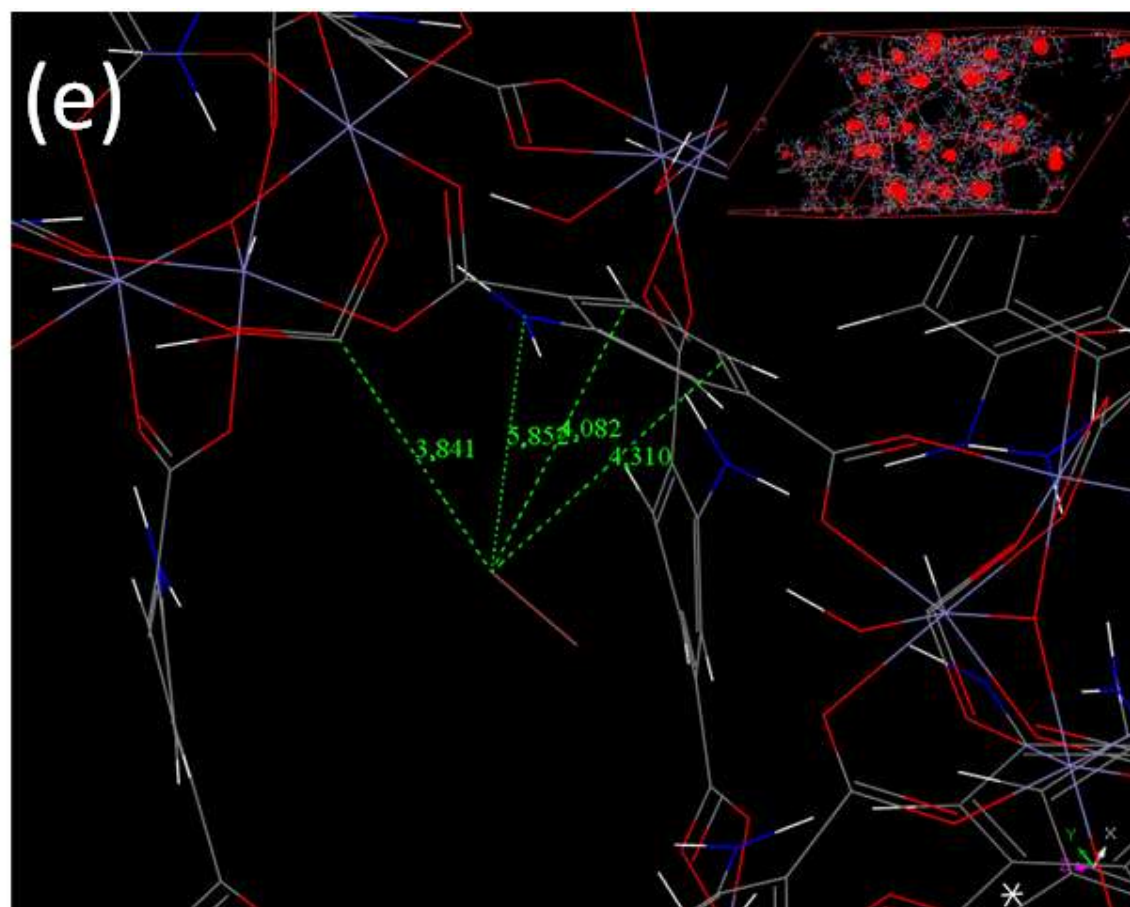

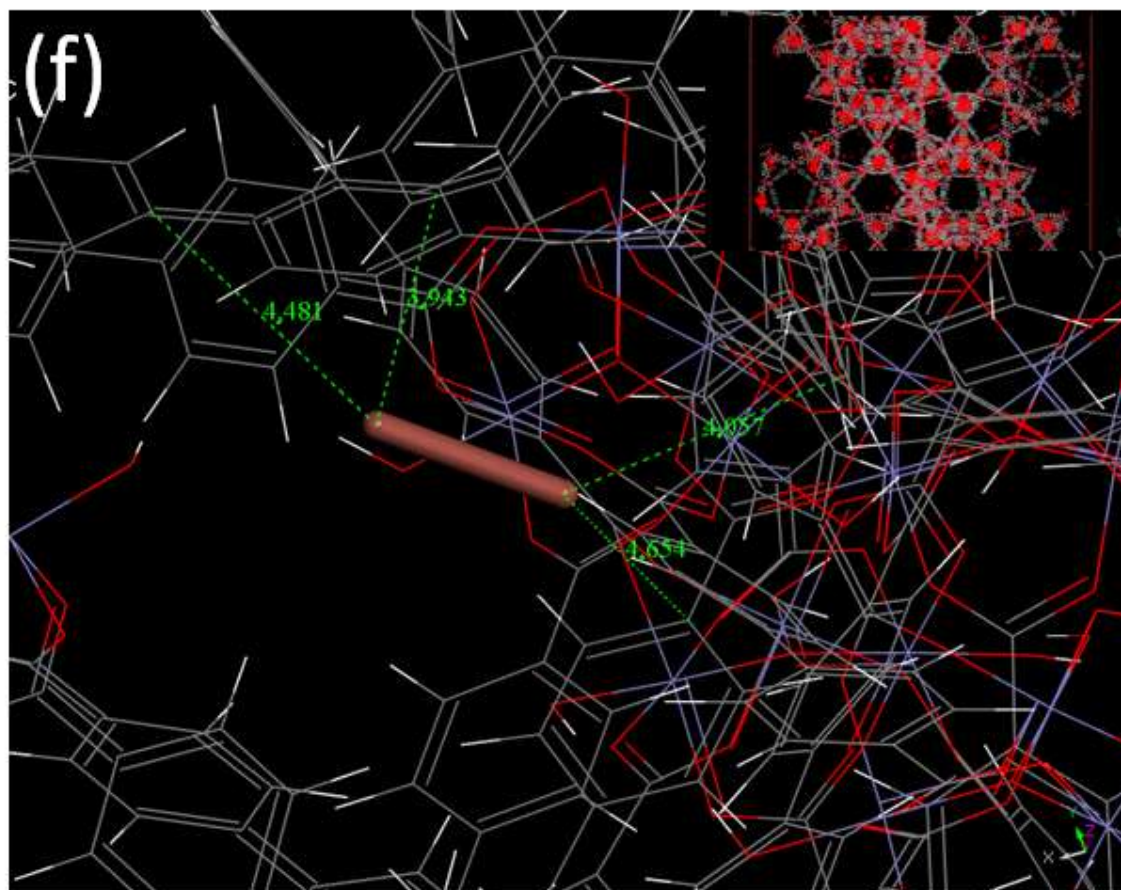



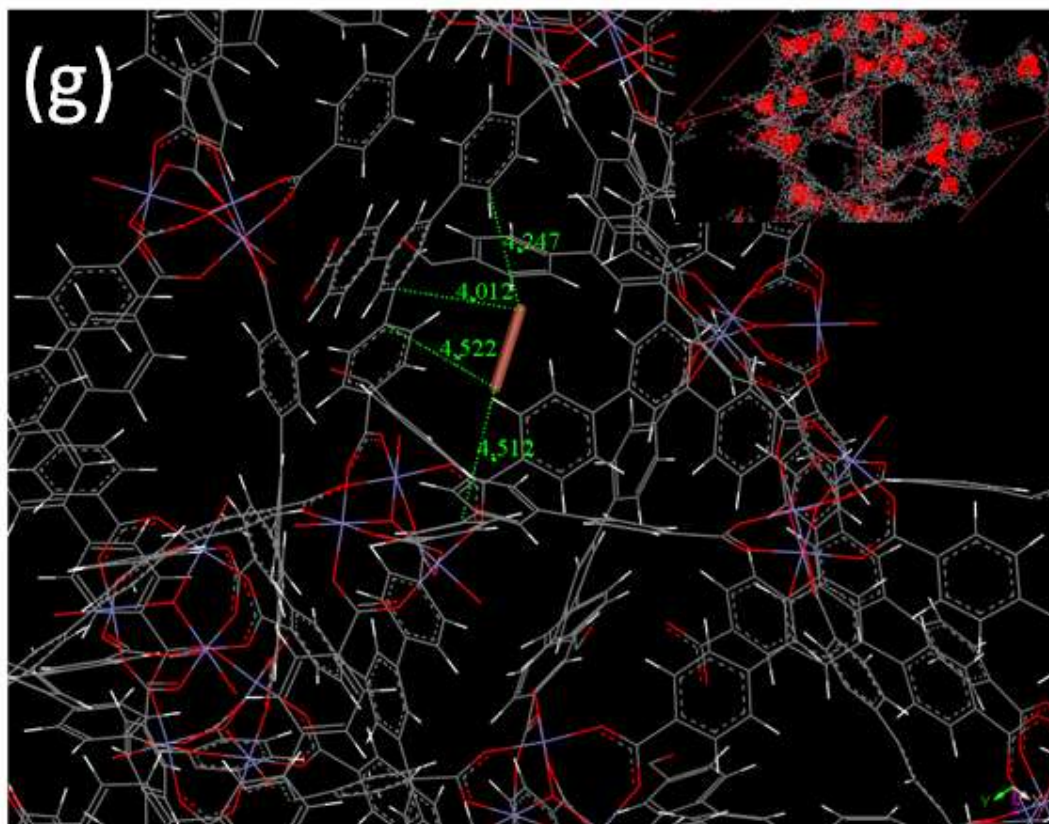

**Figure S2.** Molecular conformations of the first I<sub>2</sub> molecule adsorbed onto MOF structures belonging to the MIL-100/101 series: (a) MIL-100, (b) MIL-101-Cl, (c) MIL-101-Br, (d) MIL-101-2CF<sub>3</sub>, (e) MIL-101-NH<sub>2</sub>, (f) MIL-101-biphenyl, (g) MIL-100-BTB, as obtained based on the Monte Carlo simulations. At the corner of the picture, the density plot (red points) to localize the main adsorption sites is given for each sample.

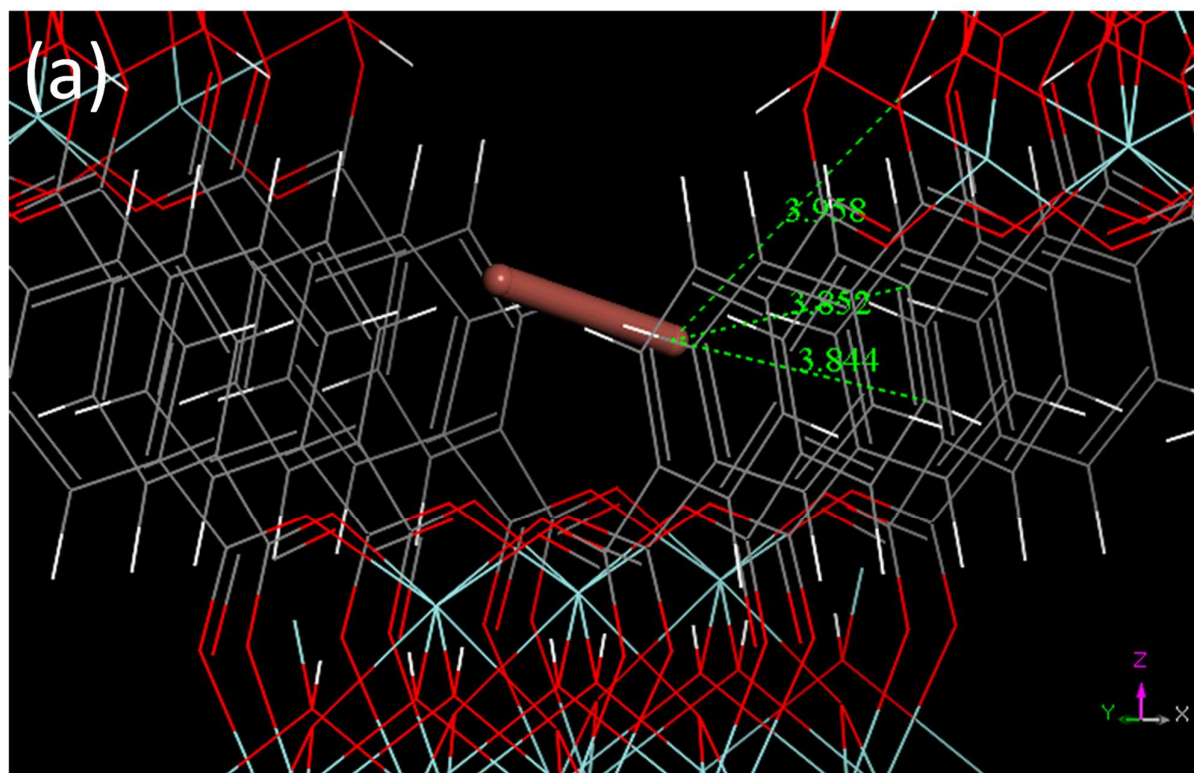

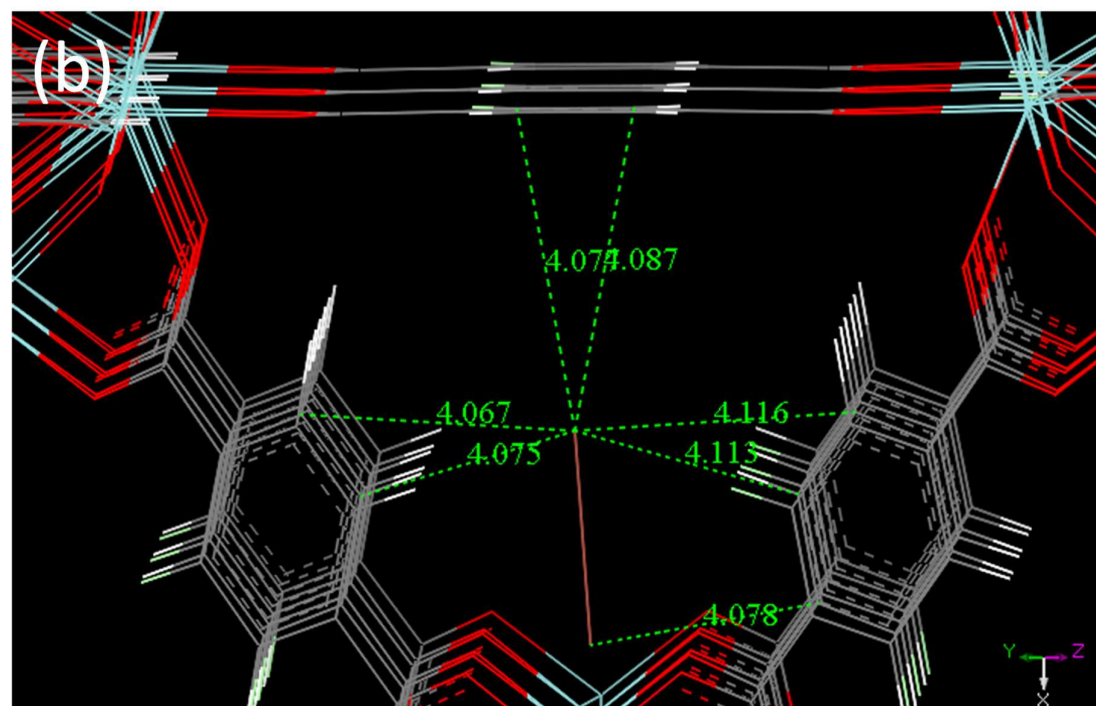

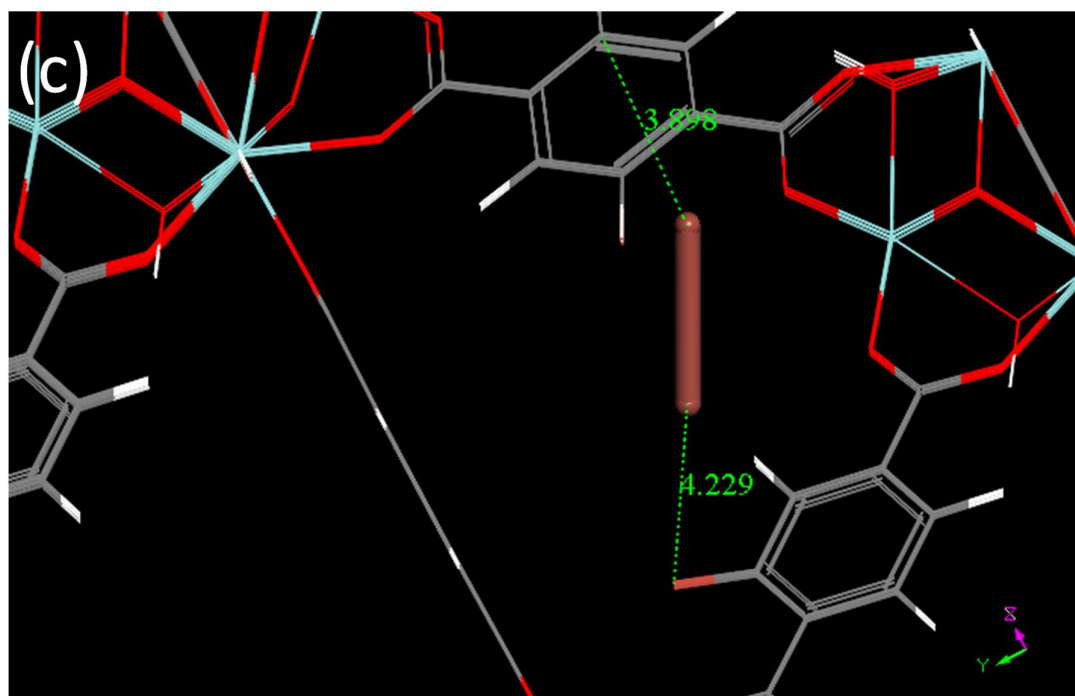



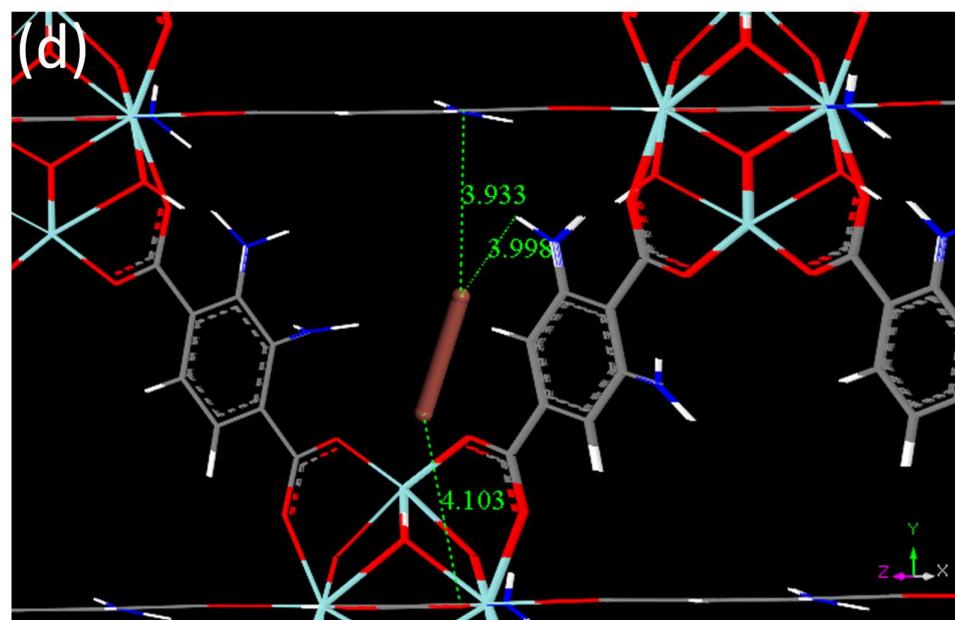

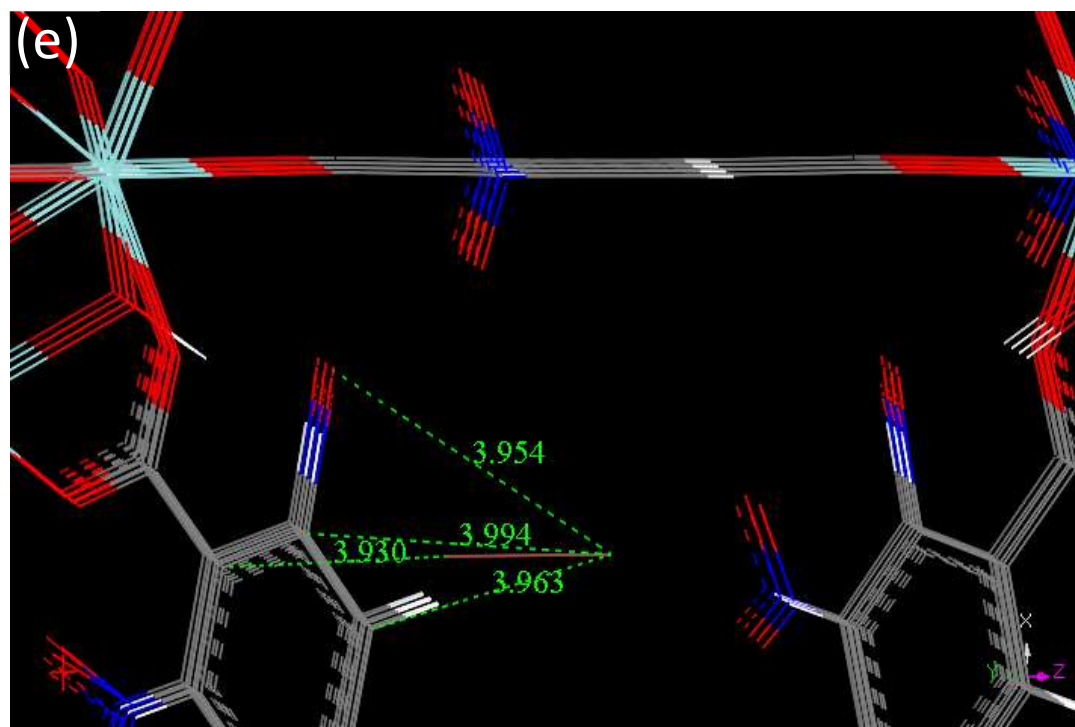

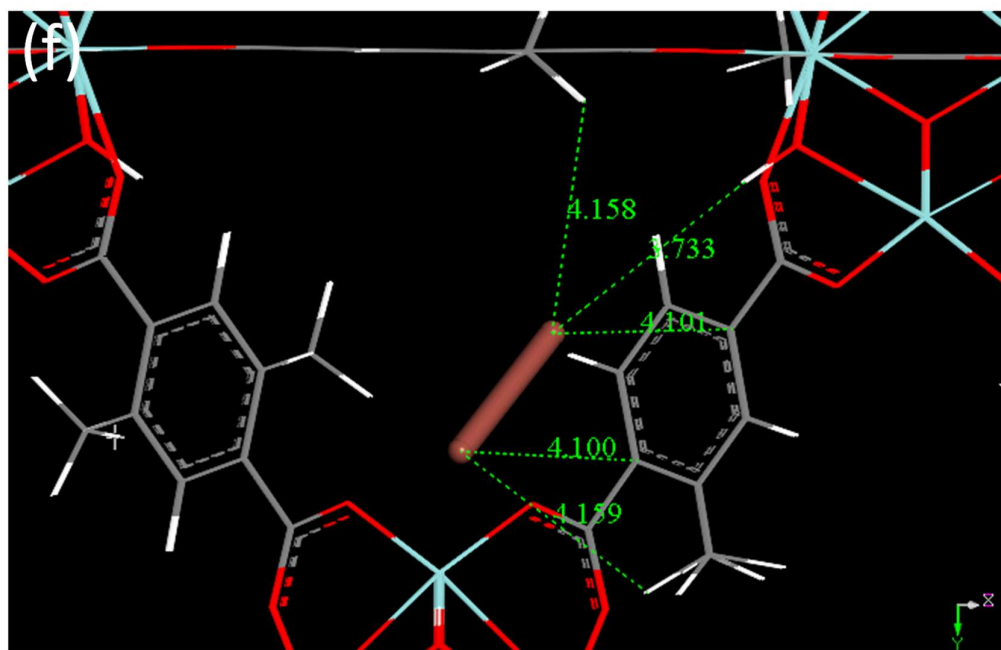

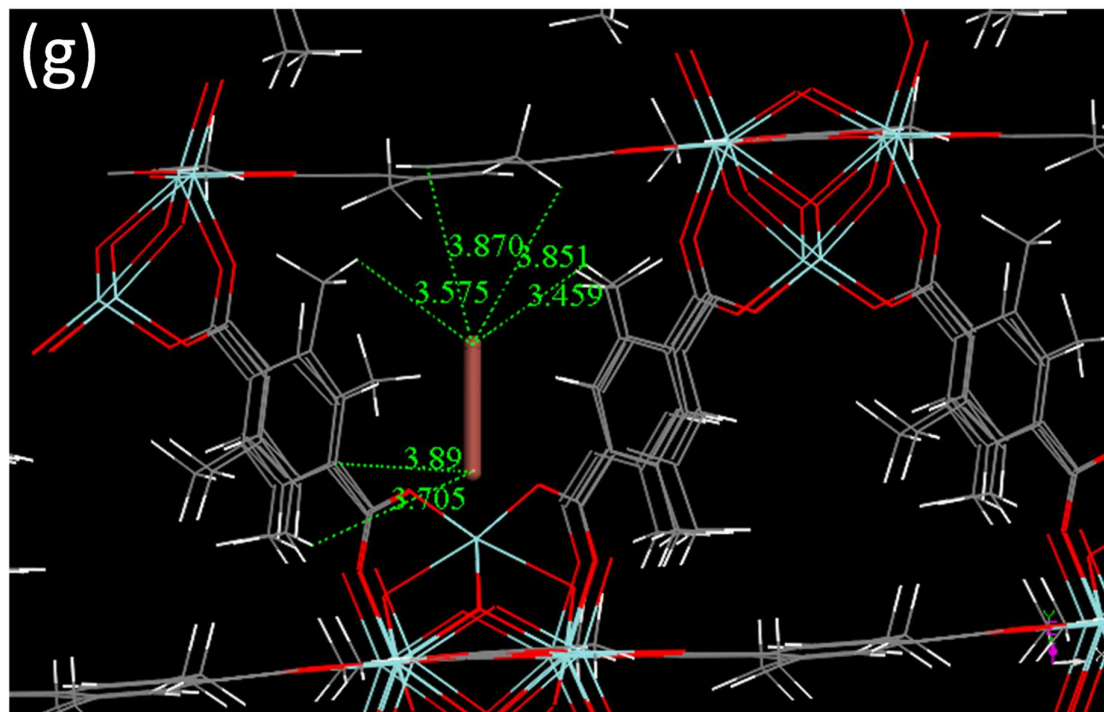

**Figure S3.** Molecular conformations of the first I<sub>2</sub> molecule adsorbed onto MOF structures belonging to the UiO-66 series: (a) H, (b) Cl, (c) Br, (d) NH<sub>2</sub>, (e) NO<sub>2</sub>, (f) CH<sub>3</sub>, (g) 2CH<sub>3</sub>, as obtained based on the Monte Carlo simulations

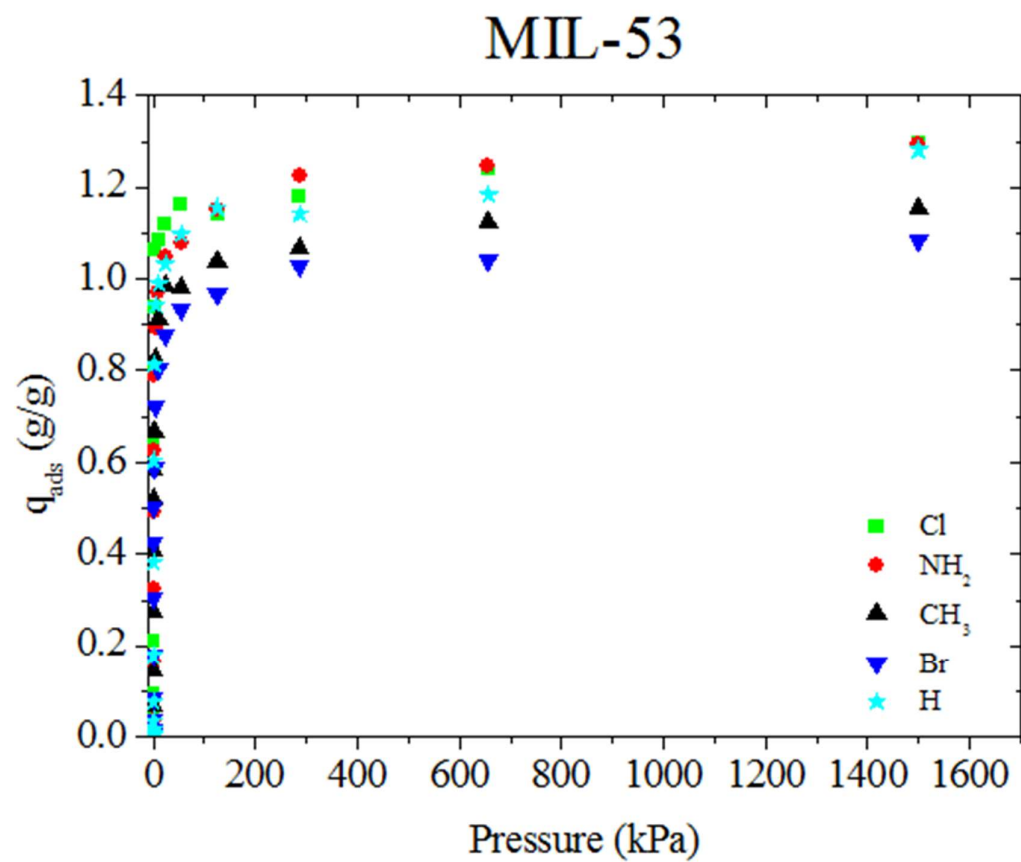

**Figure S4.** Adsorption isotherms for I<sub>2</sub> onto MOF structures belonging to the MIL-53 series, as calculated based on the Monte Carlo simulations

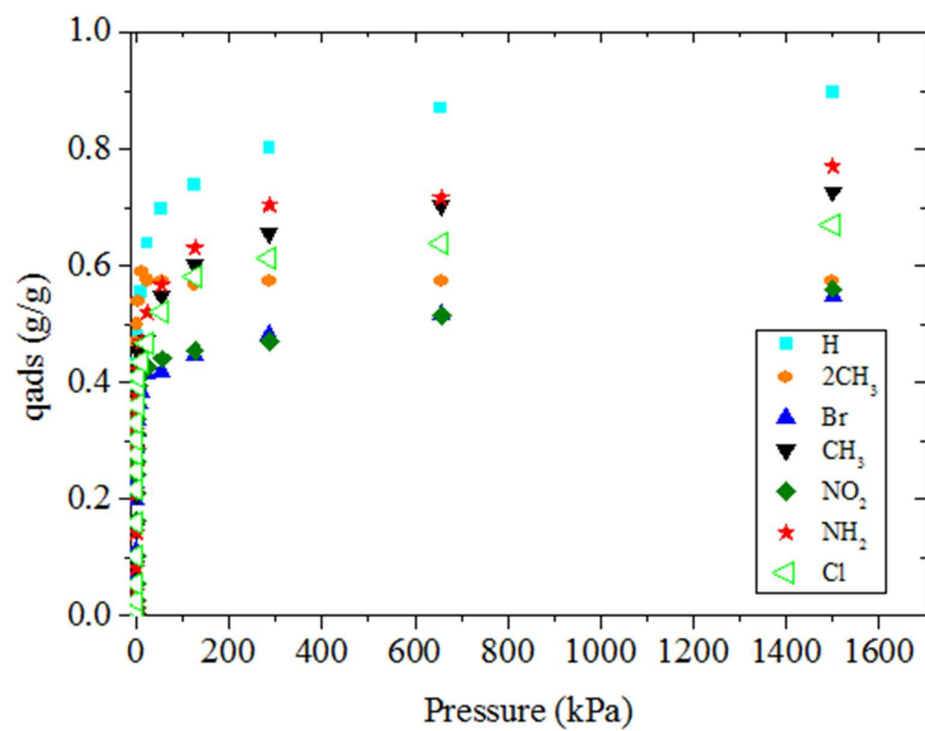

**Figure S5.** Adsorption isotherms for  $\text{I}_2$  onto MOF structures belonging to the UiO-66 series, as calculated based on the Monte Carlo simulations

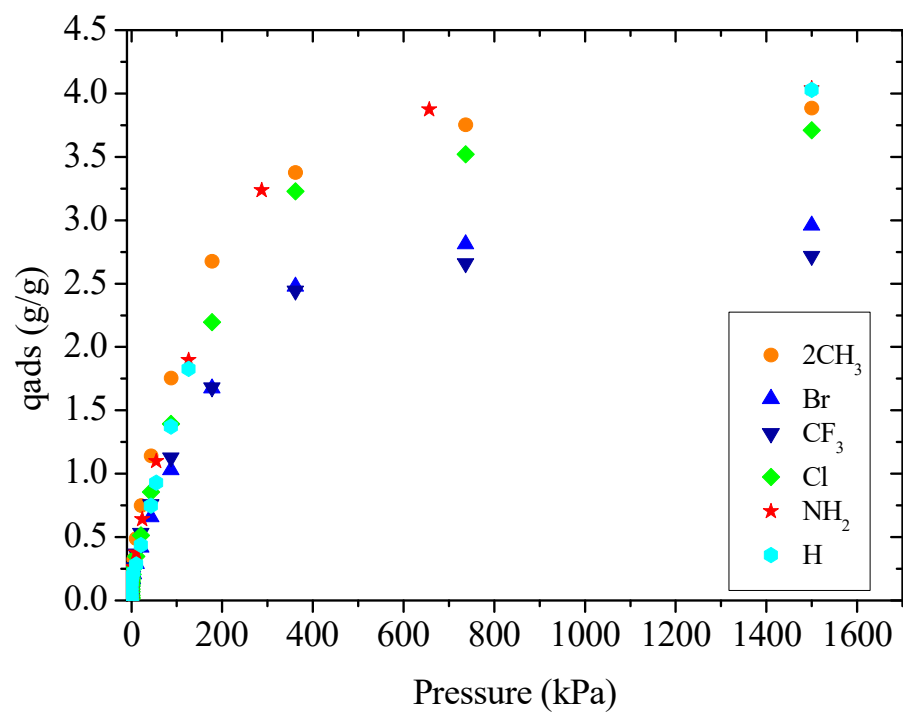

**Figure S6.** Adsorption isotherms for  $I_2$  onto MOF structures belonging to the MIL-101 series, as calculated based on the Monte Carlo simulations

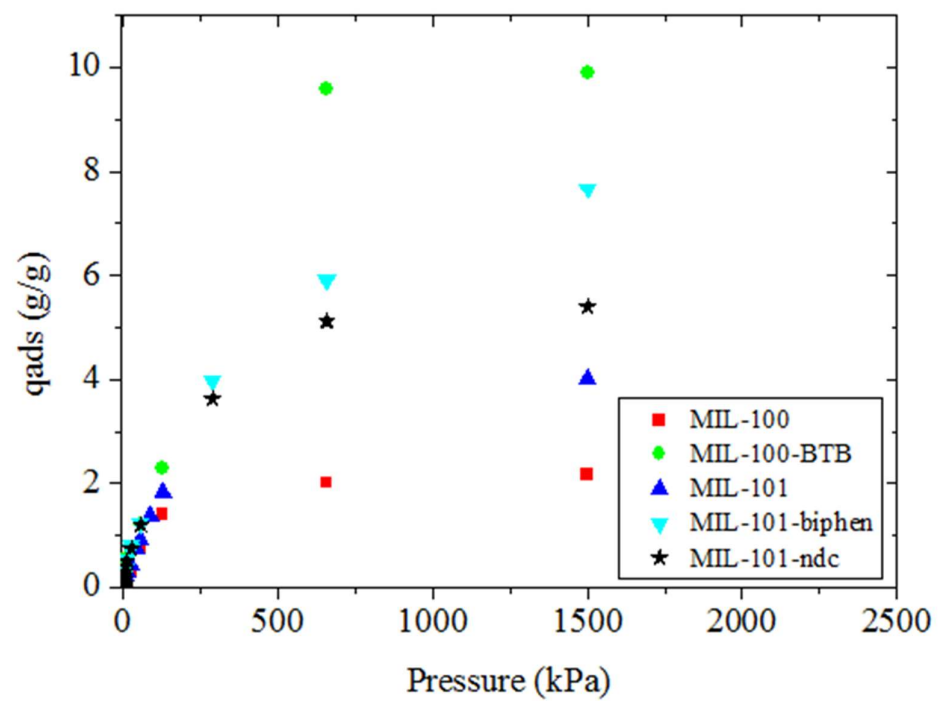

**Figure S7.** Adsorption isotherms for I<sub>2</sub> onto MOF structures belonging to the modified MIL-100/MIL-101 solids, as calculated based on the Monte Carlo simulations.



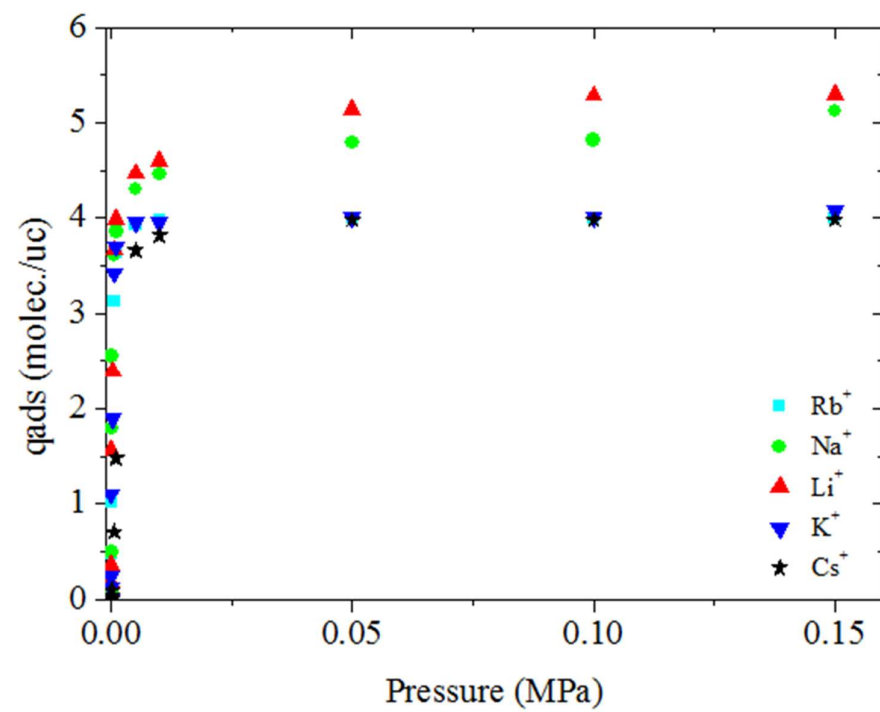

**Figure S8.** Adsorption isotherms for I<sub>2</sub> onto MOF structures belonging to the cation-saturated Zn-BTeC family, as calculated based on the Monte Carlo simulations.

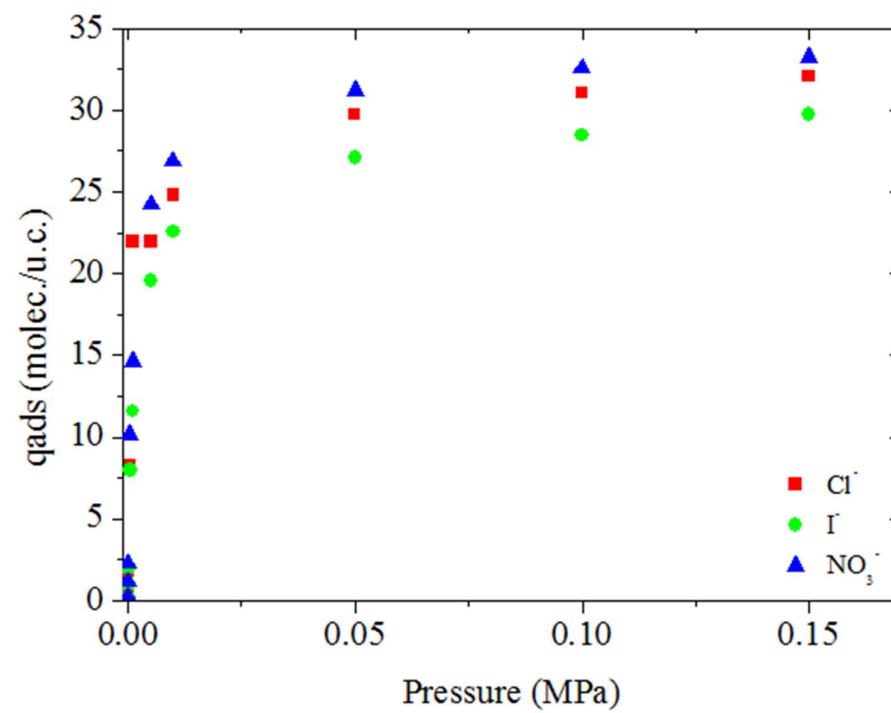

**Figure S9.** Adsorption isotherms for I<sub>2</sub> onto MOF structures belonging to the anion-saturated MIL-127, as calculated based on the Monte Carlo simulations.
